# Supplementary material for: Copper as a target for prostate cancer therapeutics: copper-ionophore pharmacology and altering systemic copper distribution
Source: PubMed Central journal article supplement (PMC5095059; doi:10.18632/oncotarget.9245), 2016-05-09
Supplement: oncotarget-07-37064-s001.pdf [file oncotarget-07-37064-s001.pdf]

## Copper as a target for prostate cancer therapeutics: copper-ionophore pharmacology and altering systemic copper distribution

### SUPPLEMENTARY FIGURE

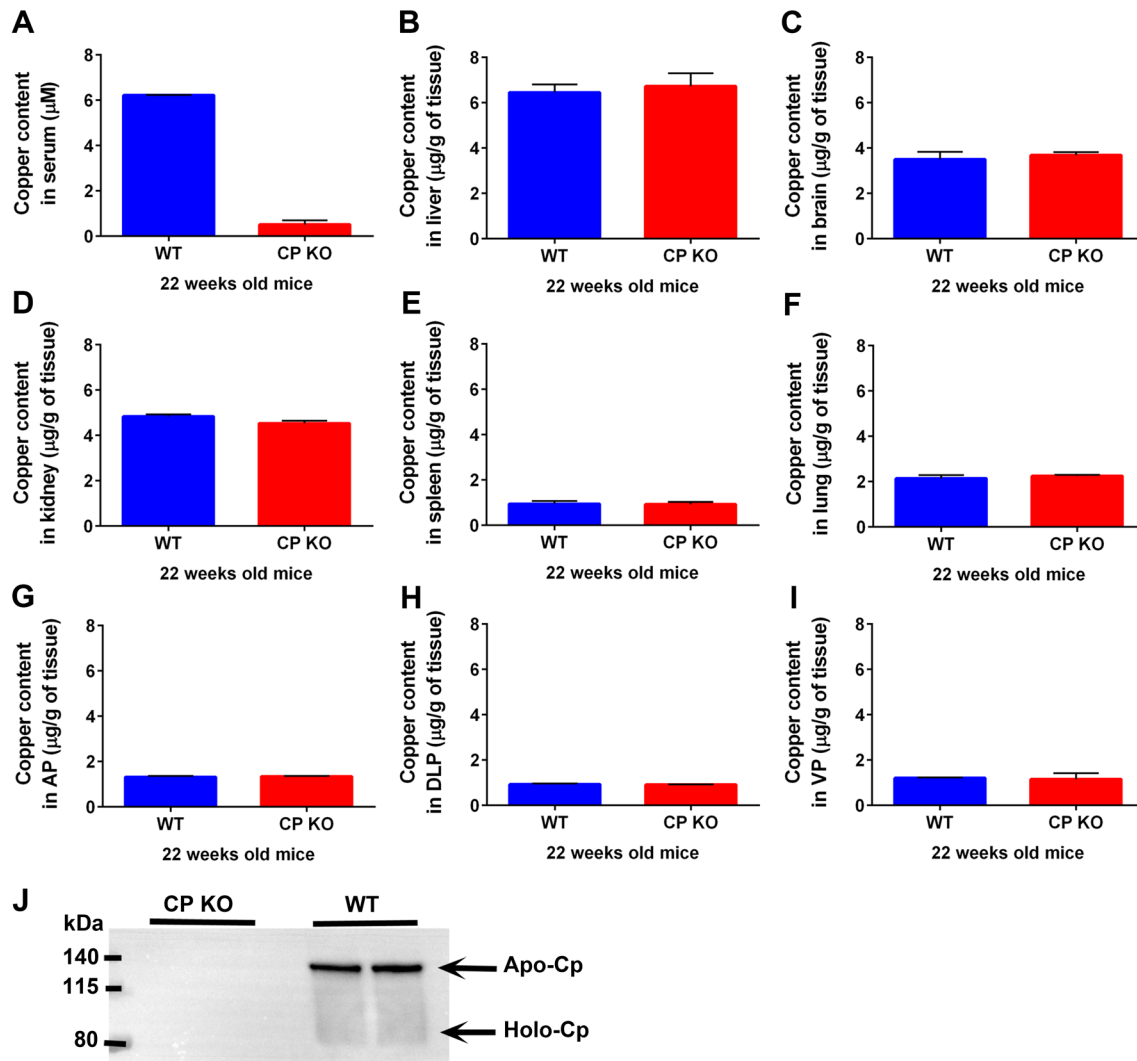

**Supplementary Figure S1: Serum ceruloplasmin deficiency is not associated with copper dyshomeostasis in mice.** Ceruloplasmin (CP) knockout mice have normal tissue copper levels. **A-I.** Inductively coupled plasma mass spectrometry (ICP-MS) was used to determine copper concentrations in serum, liver, brain, kidney, spleen, lung and prostate lobes [anterior prostate (AP), dorsolateral prostate (DLP) and ventral prostate (VP)] of 22-week old wild type ( $n=2$ ) and ceruloplasmin knockout mice ( $n=2$ ). Results are shown as either  $\mu\text{g/g}$  wet weight for tissues or  $\mu\text{M}$  for serum. **J.** Western blot analysis confirming Ceruloplasmin knockout. Western blot analysis of ceruloplasmin (CP) expression in serum of 22-week old wild type ( $n=2$ ) and ceruloplasmin knockout mice ( $n=2$ ) (50  $\mu\text{g}$  protein).
